# Supplementary material for: Replacing the cyano (–CN) group to design environmentally friendly fused-ring electron acceptors
Source: Royal Society of Chemistry journal article supplement (doi:10.1039/d1cp02566j), 2021-01-01
Supplement: d1cp02566j1.pdf [file d1cp02566j1.pdf]

# Supporting Information

## Replacing Cyano ( $-\text{C}\equiv\text{N}$ ) Group to Design Environmentally Friendly Fused-Ring Electron Acceptors

Chuang Yao <sup>1\*</sup>, Yezi Yang <sup>1</sup>, Lei Li <sup>1</sup>, Maolin Bo <sup>1</sup>, Cheng Peng <sup>1</sup>, Zhongkai Huang <sup>1</sup> & Jinshan Wang <sup>2\*</sup>

<sup>1</sup> Key Laboratory of Extraordinary Bond Engineering and Advance Materials Technology (EBEAM) of Chongqing, School of Materials Science and Engineering, Yangtze Normal University, Chongqing 408100, P.R. China

<sup>2</sup> School of Materials Science and Engineering, Yancheng Institute of Technology, Yancheng 224051, P. R. China

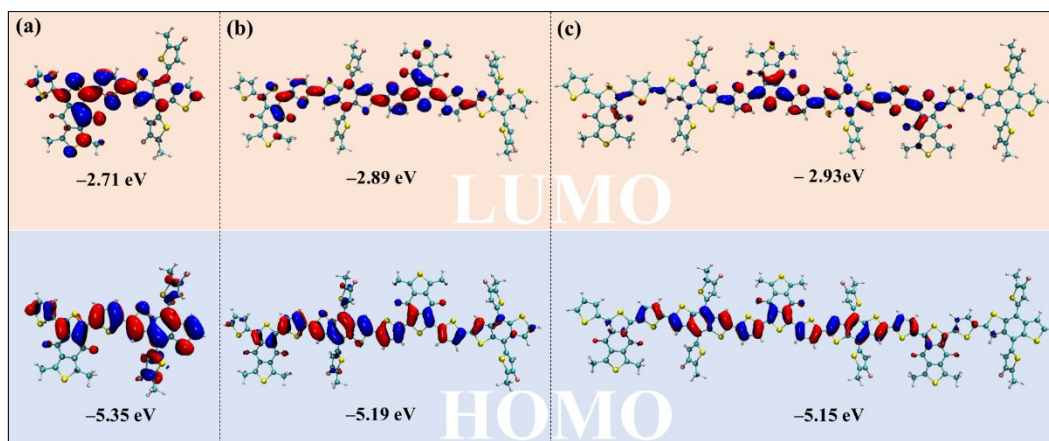

**Figure S1.** Spatial distribution and energy levels of HOMO and LUMO for one repeating unit (a), two repeating units (b), and three repeating units of PBDB-TF.

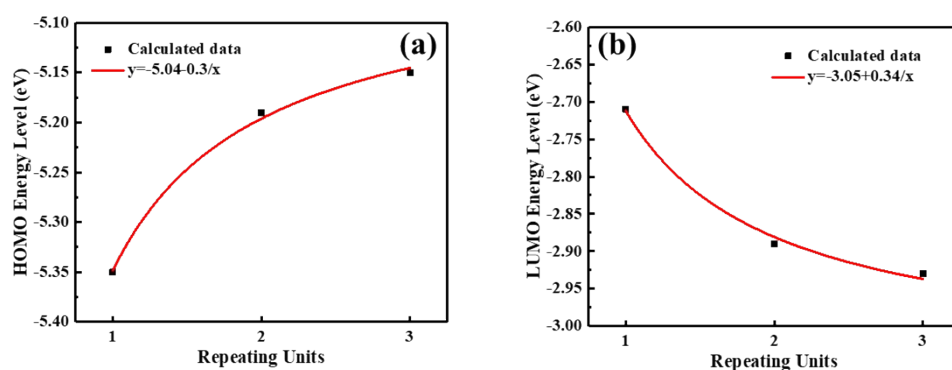

**Figure S2.** Evolution of the energy levels of HOMO (a) and LUMO (b) for one, two, and three repeating units of PBDB-TF. The red line represents the data fitting curve.

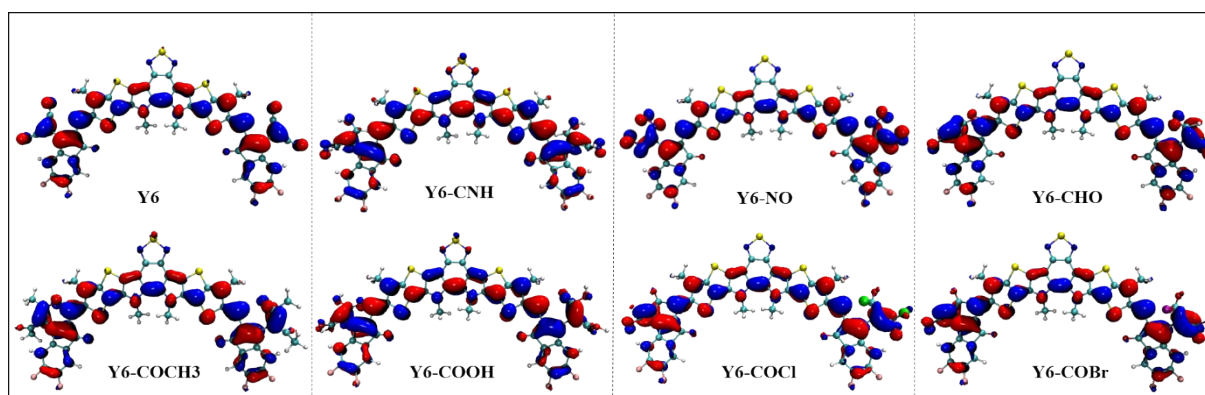

**Figure S3** Spatial distribution of LUMO for Y6, Y6-CN, Y6-NO, Y6-CHO, Y6-COCH<sub>3</sub>, Y6-COOH, Y6-COCl, and Y6-COBr.

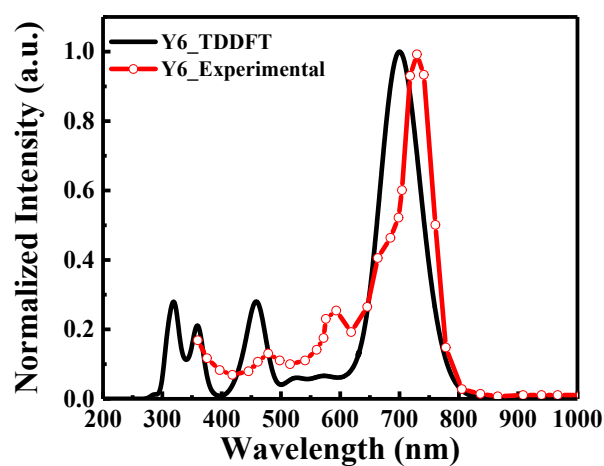

**Figure S4.** TD-DFT calculated normalized absorption spectrum and experimental result of Y6 in chloroform based on PBE0/def2-SVPD.

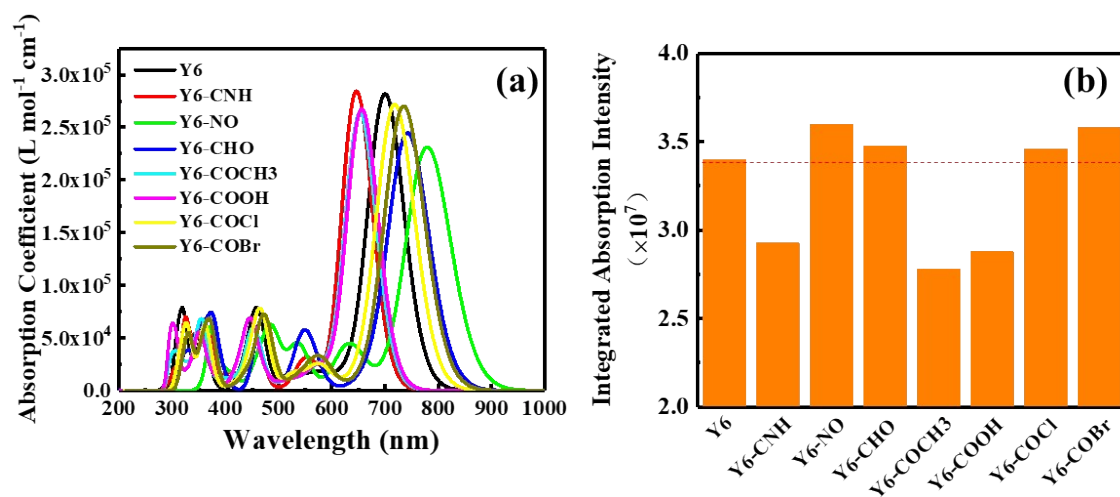

**Figure S5** TD-DFT calculated absorption spectra (a) and integrated absorption intensity (b) of Y6, Y6-CN, Y6-NO, Y6-CHO, Y6-COCH<sub>3</sub>, Y6-COOH, Y6-COCl, and Y6-COBr in chloroform based on PBE0/def2-SVPD.

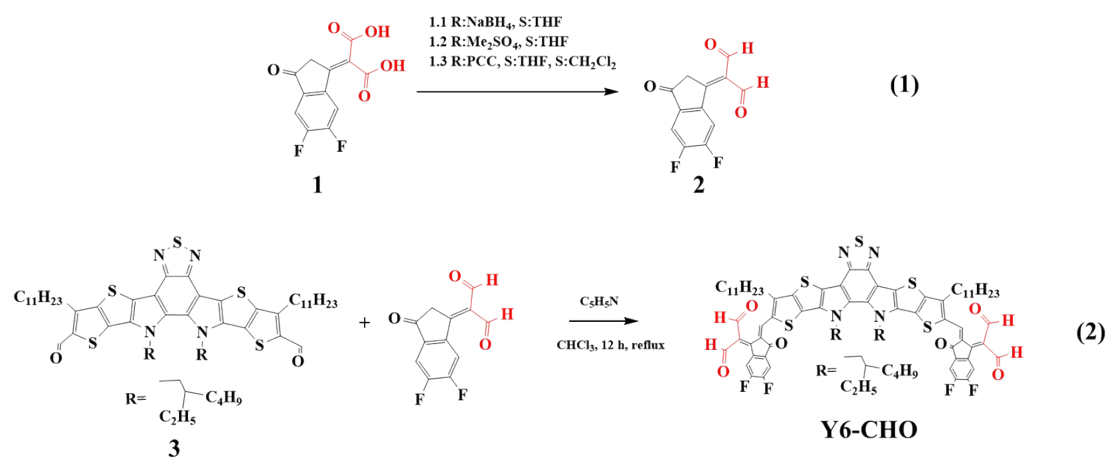

**Figure S6** Possible synthetic routes of Y6-CHO.
